# Supplementary material for: Structural Diversity of Silver Fluorinated β-Diketonates: Effect of the Terminal Substituent and Solvent
Source: MDPI journal article supplement (doi:10.3390/molecules27030677), 2022-01-20
Supplement: s1 [file s1]

## Supplementary Materials

### Structural Diversity of Silver Fluorinated $\beta$ -Diketonates: Effect of the Terminal Substituent and Solvent

*Evgeniia S. Vikulova*<sup>1,\*</sup>, *Taisiya S. Sukhikh*<sup>1</sup>, *Sergey A. Gulyaev*<sup>1,2</sup>, *Igor Yu. Ilyin*<sup>1</sup>  
and *Natalia B. Morozova*<sup>1</sup>

<sup>1</sup> Nikolaev Institute of Inorganic Chemistry, Siberian Branch of Russian Academy of Sciences, 3 Acad. Lavrentiev Ave., 630090, Novosibirsk, Russia; lazorevka@mail.ru (E.S.V.), sukhikh@niic.nsc.ru (T.S.S.), ilyin@niic.nsc.ru (I.Y.I.), mor@niic.nsc.ru (N.B.M.)

<sup>2</sup> Novosibirsk State University, 2 Pirogova Str., 630090, Novosibirsk, Russia; s.gulyaev@ngsu.ru (S.A.G.)

\* Correspondence: lazorevka@mail.ru; Tel.: +7 383 3309556

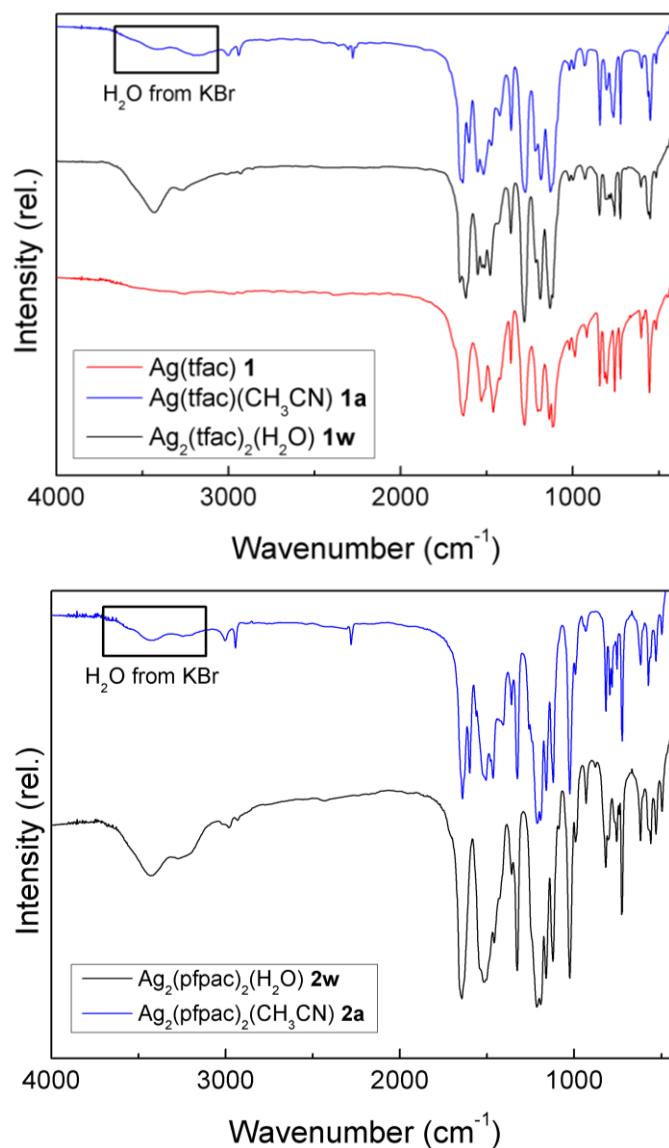

**Figure S1.** Typical IR spectra of the samples.

**Table S1.** Crystal data and structure refinement for the compounds.

| Identification code                         | <b>1</b>                                                      | <b>1a</b>                                                                                    | <b>1t</b>                                                                     | <b>2</b>                                                      | <b>2a</b>                                                                       | <b>2t</b>                                                                      |
|---------------------------------------------|---------------------------------------------------------------|----------------------------------------------------------------------------------------------|-------------------------------------------------------------------------------|---------------------------------------------------------------|---------------------------------------------------------------------------------|--------------------------------------------------------------------------------|
| Empirical formula                           | C <sub>5</sub> H <sub>4</sub> AgF <sub>3</sub> O <sub>2</sub> | C <sub>14</sub> H <sub>14</sub> Ag <sub>2</sub> F <sub>6</sub> N <sub>2</sub> O <sub>4</sub> | C <sub>17</sub> H <sub>16</sub> Ag <sub>2</sub> F <sub>6</sub> O <sub>4</sub> | C <sub>6</sub> H <sub>4</sub> AgF <sub>3</sub> O <sub>2</sub> | C <sub>14</sub> H <sub>11</sub> Ag <sub>2</sub> F <sub>10</sub> NO <sub>4</sub> | C <sub>19</sub> H <sub>16</sub> Ag <sub>2</sub> F <sub>10</sub> O <sub>4</sub> |
| Formula weight                              | 260.95                                                        | 604.01                                                                                       | 614.04                                                                        | 310.96                                                        | 662.98                                                                          | 714.06                                                                         |
| Temperature/K                               | 150(2)                                                        | 150(2)                                                                                       | 150(2)                                                                        | 150(2)                                                        | 150(2)                                                                          | 150(2)                                                                         |
| Space group                                 | <i>Fddd</i>                                                   | <i>P</i> -1                                                                                  | <i>P</i> -1                                                                   | <i>P</i> 2 <sub>1</sub> / <i>n</i>                            | <i>P</i> -1                                                                     | <i>P</i> -1                                                                    |
| a/Å                                         | 11.3887(9)                                                    | 5.0839(10)                                                                                   | 8.3396(9)                                                                     | 14.531(4)                                                     | 8.6581(3)                                                                       | 8.6850(6)                                                                      |
| b/Å                                         | 15.0409(11)                                                   | 8.1716(17)                                                                                   | 10.7518(12)                                                                   | 24.835(7)                                                     | 10.9844(3)                                                                      | 11.7496(7)                                                                     |
| c/Å                                         | 31.601(2)                                                     | 11.737(2)                                                                                    | 11.6428(12)                                                                   | 19.833(5)                                                     | 12.5306(6)                                                                      | 12.6738(9)                                                                     |
| α/°                                         | 90                                                            | 88.158(7)                                                                                    | 105.470(4)                                                                    | 90                                                            | 64.3360(10)                                                                     | 62.928(3)                                                                      |
| β/°                                         | 90                                                            | 78.284(6)                                                                                    | 102.392(3)                                                                    | 100.861(8)                                                    | 74.069(2)                                                                       | 80.634(4)                                                                      |
| γ/°                                         | 90                                                            | 75.566(7)                                                                                    | 90.890(4)                                                                     | 90                                                            | 82.9590(10)                                                                     | 72.814(3)                                                                      |
| Volume/Å <sup>3</sup>                       | 5413.1(7)                                                     | 462.29(16)                                                                                   | 979.76(18)                                                                    | 7029(3)                                                       | 1032.88(7)                                                                      | 1099.58(13)                                                                    |
| Z                                           | 32                                                            | 1                                                                                            | 2                                                                             | 32                                                            | 2                                                                               | 2                                                                              |
| ρ <sub>calc</sub> /cm <sup>3</sup>          | 2.562                                                         | 2.170                                                                                        | 2.081                                                                         | 2.351                                                         | 2.132                                                                           | 2.157                                                                          |
| μ/mm <sup>-1</sup>                          | 2.979                                                         | 2.199                                                                                        | 2.075                                                                         | 2.346                                                         | 2.005                                                                           | 1.890                                                                          |
| F(000)                                      | 3968.0                                                        | 292.0                                                                                        | 596.0                                                                         | 4736.0                                                        | 636.0                                                                           | 692.0                                                                          |
| Crystal size/mm <sup>3</sup>                | 0.1 × 0.06 × 0.05                                             | 0.11 × 0.03 × 0.03                                                                           | 0.22 × 0.08 × 0.07                                                            | 0.51 × 0.03 × 0.03                                            | 0.3 × 0.17 × 0.12                                                               | 0.35 × 0.2 × 0.05                                                              |
| Radiation                                   | MoKα (λ = 0.71073)                                            | MoKα (λ = 0.71073)                                                                           | MoKα (λ = 0.71073)                                                            | MoKα (λ = 0.71073)                                            | MoKα (λ = 0.71073)                                                              | MoKα (λ = 0.71073)                                                             |
| 2θ range for data collection/°              | 5.156 to 52.77                                                | 5.148 to 61.066                                                                              | 4.616 to 63.194                                                               | 3.204 to 41.632                                               | 4.114 to 51.504                                                                 | 4.912 to 51.788                                                                |
| Index ranges                                | -14 ≤ h ≤ 14, -18 ≤ k ≤ 18, -39 ≤ l ≤ 36                      | -7 ≤ h ≤ 7, -11 ≤ k ≤ 11, -16 ≤ l ≤ 16                                                       | -12 ≤ h ≤ 12, -15 ≤ k ≤ 15, -17 ≤ l ≤ 17                                      | -14 ≤ h ≤ 14, -24 ≤ k ≤ 24, -19 ≤ l ≤ 19                      | -10 ≤ h ≤ 10, -13 ≤ k ≤ 10, -15 ≤ l ≤ 15                                        | -10 ≤ h ≤ 9, -14 ≤ k ≤ 14, -15 ≤ l ≤ 15                                        |
| Reflections collected                       | 18733                                                         | 8262                                                                                         | 18647                                                                         | 50735                                                         | 9845                                                                            | 9659                                                                           |
| Independent reflections                     | 1383 [R <sub>int</sub> = 0.0276, R <sub>sigma</sub> = 0.0121] | 2819 [R <sub>int</sub> = 0.0263, R <sub>sigma</sub> = 0.0306]                                | 6499 [R <sub>int</sub> = 0.0479, R <sub>sigma</sub> = 0.0472]                 | 7369 [R <sub>int</sub> = 0.1574, R <sub>sigma</sub> = 0.1006] | 3856 [R <sub>int</sub> = 0.0239, R <sub>sigma</sub> = 0.0264]                   | 4209 [R <sub>int</sub> = 0.0595, R <sub>sigma</sub> = 0.0742]                  |
| Data/restraints/parameters                  | 1383/0/131                                                    | 2819/0/129                                                                                   | 6499/0/265                                                                    | 7369/42/777                                                   | 3856/0/283                                                                      | 4209/0/319                                                                     |
| Goodness-of-fit on F <sup>2</sup>           | 1.374                                                         | 1.062                                                                                        | 1.079                                                                         | 1.016                                                         | 1.030                                                                           | 1.015                                                                          |
| Final R indexes [I ≥ 2σ (I)]                | R <sub>1</sub> = 0.0524, wR <sub>2</sub> = 0.1154             | R <sub>1</sub> = 0.0263, wR <sub>2</sub> = 0.0616                                            | R <sub>1</sub> = 0.0364, wR <sub>2</sub> = 0.0973                             | R <sub>1</sub> = 0.0773, wR <sub>2</sub> = 0.1817             | R <sub>1</sub> = 0.0257, wR <sub>2</sub> = 0.0617                               | R <sub>1</sub> = 0.0488, wR <sub>2</sub> = 0.1188                              |
| Final R indexes [all data]                  | R <sub>1</sub> = 0.0548, wR <sub>2</sub> = 0.1163             | R <sub>1</sub> = 0.0303, wR <sub>2</sub> = 0.0631                                            | R <sub>1</sub> = 0.0392, wR <sub>2</sub> = 0.1012                             | R <sub>1</sub> = 0.1265, wR <sub>2</sub> = 0.2084             | R <sub>1</sub> = 0.0308, wR <sub>2</sub> = 0.0652                               | R <sub>1</sub> = 0.0602, wR <sub>2</sub> = 0.1276                              |
| Largest diff. peak/hole / e Å <sup>-3</sup> | 0.82/-1.17                                                    | 0.66/-1.25                                                                                   | 1.71/-1.81                                                                    | 4.07/-1.24                                                    | 0.61/-0.56                                                                      | 1.51/-1.61                                                                     |

**Table S2.** Geometry analysis of the complexes showing coordination number of Ag of 4 by SHAPE software. The best description of the polyhedral is marked green.

| Complex  | Central atom | Square ( $D_{4h}$ ) | Tetrahedron ( $Td$ ) | Seesaw ( $C_{2v}$ ) | Vacant trigonal bipyramid ( $C_{3v}$ ) |
|----------|--------------|---------------------|----------------------|---------------------|----------------------------------------|
| <b>1</b> | Ag1          | 6.427               | 20.309               | 12.383              | 19.861                                 |
|          | Ag2          | 30.85               | 3.247                | 5.072               | 3.011                                  |
| <b>2</b> | Ag1          | 32.177              | 5.235                | 5.516               | 3.152                                  |
|          | Ag2          | 29.228              | 5.307                | 6.328               | 3.614                                  |
|          | Ag3          | 27.809              | 5.2                  | 5.126               | 4.259                                  |
|          | Ag4          | 31.713              | 4.535                | 7.087               | 3.393                                  |
|          | Ag5          | 27.493              | 6.79                 | 7.012               | 4.649                                  |
|          | Ag6          | 30.491              | 5.536                | 6.288               | 4.542                                  |
|          | Ag7          | 33.795              | 4.009                | 5.79                | 2.19                                   |
|          | Ag8          | 25.71               | 6.672                | 5.783               | 5.553                                  |

\*SHAPE 2.1 program for the stereochemical analysis of molecular fragments by means of continuous shape measures and associated tools. <http://www.ee.ub.edu/>

**Table S3.** Geometry analysis of the complexes showing coordination number of Ag of 5 by SHAPE software. The best description of the polyhedral is marked green.

| Complex   | Central atom | Pentagon ( $D_{5h}$ ) | Vacant octahedron ( $C_{4v}$ ) | Trigonal bipyramid ( $D_{3h}$ ) | Spherical square pyramid ( $C_{4v}$ ) | Johnson trigonal bipyramid J12 ( $D_{3h}$ ) |
|-----------|--------------|-----------------------|--------------------------------|---------------------------------|---------------------------------------|---------------------------------------------|
| <b>1a</b> | Ag1          | 25.267                | 3.83                           | 6.219                           | 1.516                                 | 9.412                                       |
| <b>1t</b> | Ag1*         | 24.158                | 5.217                          | 8.168                           | 5.063                                 | 8.361                                       |
|           | Ag2          | 26.738                | 5.951                          | 4.876                           | 2.125                                 | 8.496                                       |
| <b>2a</b> | Ag1          | 26.9                  | 5.586                          | 5.67                            | 2.011                                 | 9.683                                       |
|           | Ag2          | 23.743                | 7.34                           | 7.806                           | 7.28                                  | 10.632                                      |
| <b>2t</b> | Ag1          | 21.546                | 6.277                          | 6.979                           | 3.637                                 | 10.697                                      |
|           | Ag2          | 23.982                | 8.427                          | 9.694                           | 8.448                                 | 10.142                                      |
|           | Ag2*         | 26.606                | 9.657                          | 12.134                          | 8.683                                 | 12.651                                      |

\* one of the vertices is a dummy atom lying in the middle between two C atoms of the toluene ligand.
